# Supplementary material for: Heterologous production and functional characterization of Bradyrhizobium japonicum copper-containing nitrite reductase and its physiological redox partner cytochrome c550
Source: Royal Society of Chemistry journal article supplement (doi:10.1039/d0mt00177e), 2020-11-02
Supplement: d0mt00177e1.pdf [file d0mt00177e1.pdf]

**Electronic Supplementary Information (ESI)**

**Heterologous production and functional characterization of  
*Bradyrhizobium japonicum* copper-containing nitrite reductase and its  
physiological redox partner cytochrome *c*<sub>550</sub>**

Julio C. Cristaldi,<sup>a</sup> Felix M. Ferroni,<sup>a</sup> Andrea B. Duré,<sup>a</sup> Cintia S. Ramírez,<sup>a</sup> Sergio D. Dalosto,<sup>b</sup> Alberto C. Rizzi,<sup>a</sup> Pablo J. González,<sup>a</sup> Maria G. Rivas,<sup>a</sup> and Carlos D. Brondino<sup>\*a</sup>

<sup>a</sup>Departamento de Física, Facultad de Bioquímica y Ciencias Biológicas, Universidad Nacional del Litoral and CONICET, S3000ZAA Santa Fe, Argentina

<sup>b</sup>Instituto de Física del Litoral, CONICET-UNL, Güemes 3450, S3000GLN Santa Fe, Argentina

\*email: brondino@fbc.unl.edu.ar, Tel: +54-342-457 5213

URL: <https://www.fbc.unl.edu.ar/dfbioq/>

**Fig. S1** Size-exclusion chromatography performed on a Superdex 75 column equilibrated with 10 mM Tris-HCl buffer pH 8.0 plus 200 mM NaCl. Calibration curve (Left): Aprotinin (A, 6.5 kDa), Ribonuclease (R, 13.7 kDa), Carbonic Anhydrase (CA, 29 kDa), Ovalbumin (44 kDa) and Conalbumin (75 kDa). M, D and T indicate monomer, dimer, and tetramer, respectively. Right: runs from a diluted ( $\sim 0.25$  mg/mL) sample (red) and concentrated ( $\sim 20$  mg/mL) sample (black).

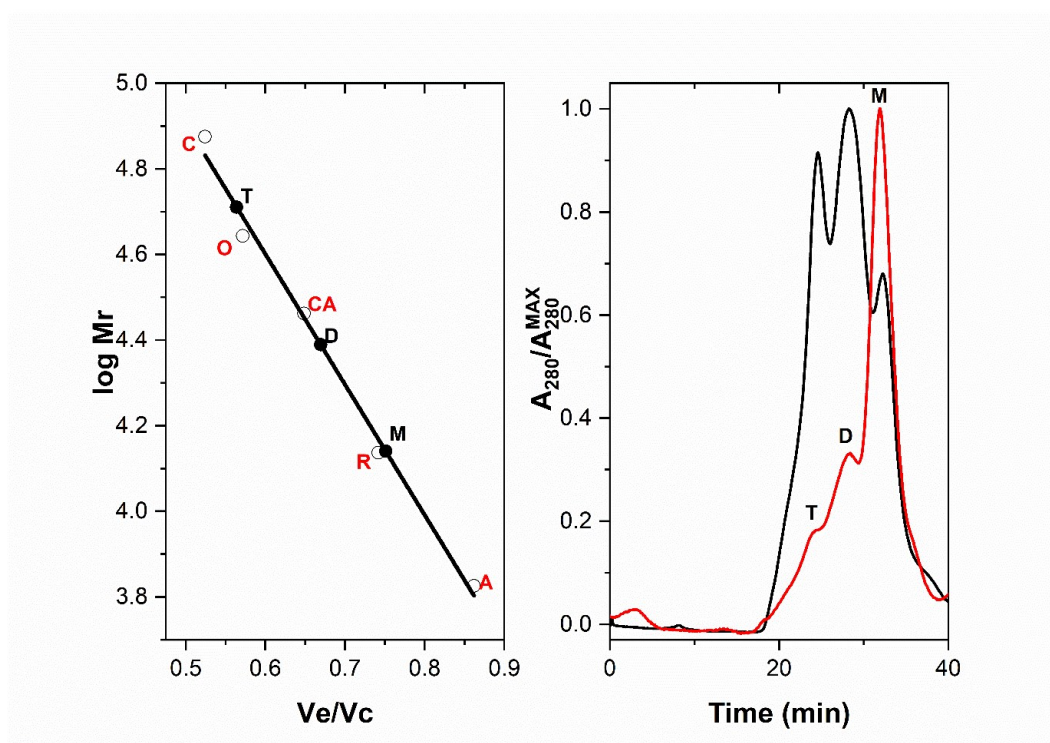

**Fig. S2 Panel A.** Cyclic voltammograms of *BjCycA* using 1 mM 4,4'-dithiopyridine as promoter of the protein-electrode interaction and 500 mM glycine as protein stabilizer. The inset shows a blank-subtracted voltammogram recorded at  $\nu=10 \text{ mV}\cdot\text{s}^{-1}$ . Typical voltammogram features indicate that the system behaves as thin-layer at this scan rate, e.g.  $i_{\text{Peak}}$  ratio  $\sim 1$ , half-height peak width  $\sim 90 \text{ mV}$ , and  $\Delta E_{\text{Peak}}$  lower than  $59/n \text{ mV}$ . **Panel B.** Left, Laviron plot showing the variation of the anodic and cathodic peaks potentials ( $E_{\text{Peak}}$ ) as a function of the logarithm of the scan rate. Right, Linear fitting of the variation of CV cathodic and anodic peaks current ( $i_{\text{Peak}}$ ) with the scan rate (right), adding evidence to the thin-layer

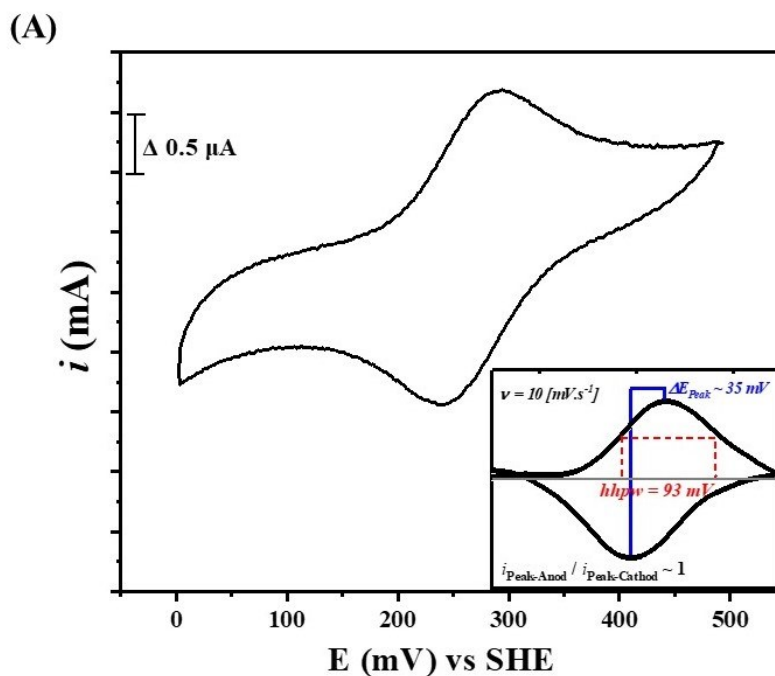

(B)

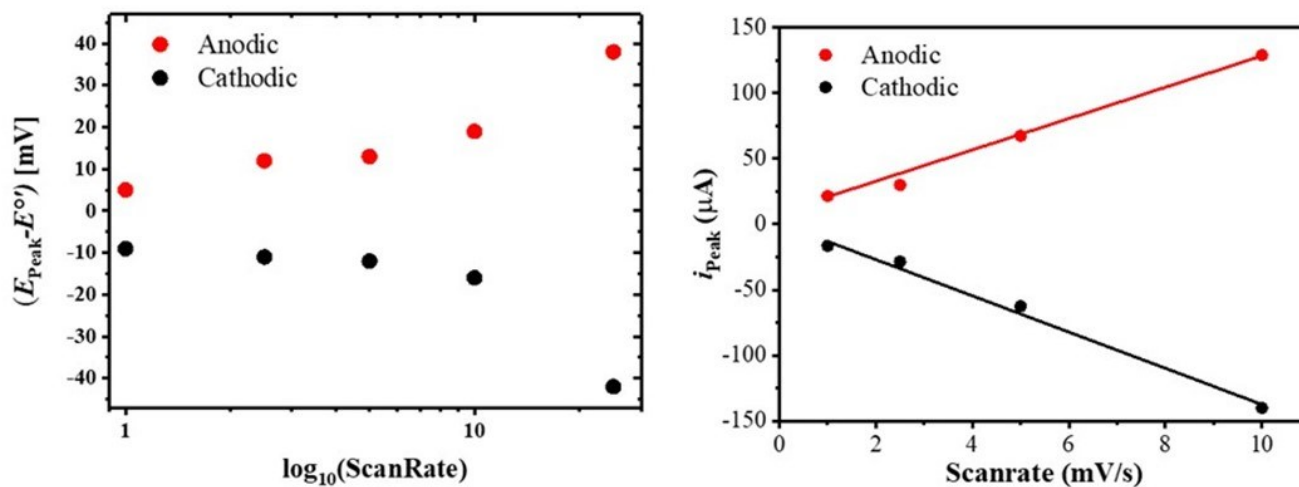

behavior.



**Fig. S3** QM part of the QM/MM calculations. Panel A includes residues His328, His121, His156, which are the ligands of the catalytic copper atom T2, His116, His167, Cys157, which are nearest neighbors of copper atom at T1, and the weaker Met 172 ligand, and the second sphere residues Asp119 (Asp<sub>CAT</sub>), His277 (His<sub>CAT</sub>), Gly171, and Ser170. The color codes are green for carbon, blue for Nitrogen, red Oxygens, light grey for hydrogen, yellow for sulfur, and grey for Cu. Water hydrogen bond interactions and the hydrogen bond (His156)-N<sup>δ1</sup>H...O=C-(Cys157) are indicated as red dashed lines. Three water molecules were included based on structural data of other similar copper-nitrite reductases (PDB 1OE1 and 5F7B), H2OA1 bonded to T2 copper, H2OA2 which is bridging His<sub>CAT</sub> and Asp<sub>CAT</sub> and H2OA3 bonded to Asp<sub>CAT</sub>. His<sub>CAT</sub> and Asp<sub>CAT</sub> are protonated and deprotonated, respectively. Panels B and C are overviews in different projection of the of the T1 and T2 sites shown in Panel A, respectively. Cartesian coordinates of the atoms are given at the end of the document.

(A)

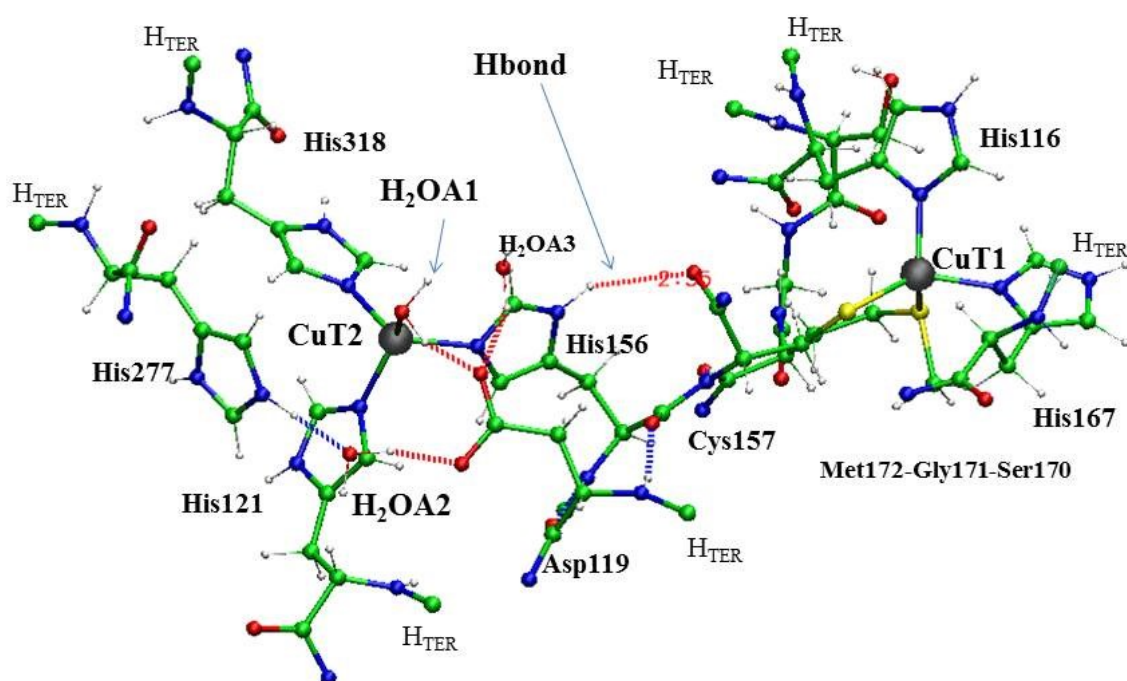

(B)

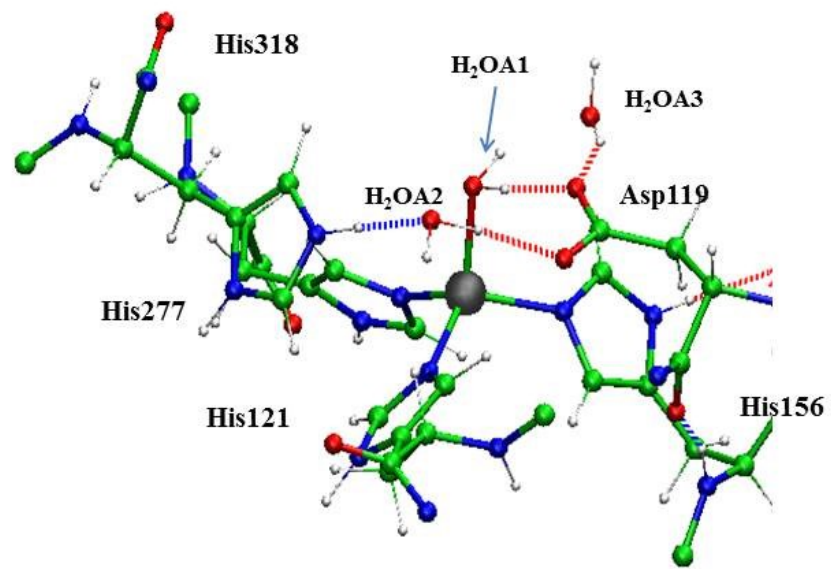

(C)

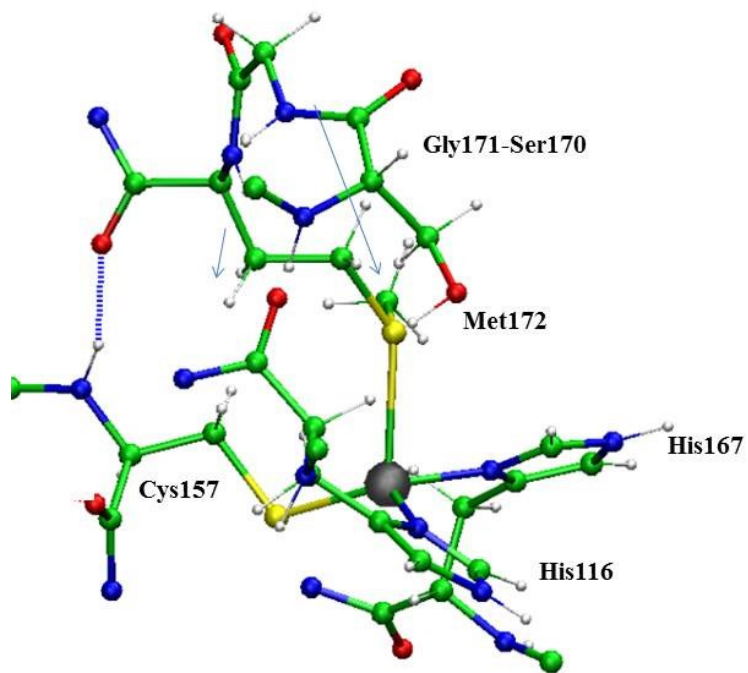

**Fig. S4** Computed T1 UV-vis absorption spectra of *Bj*NirK (pink) and *Sm*NirK (green) determined by TDDFT using the HSEh1PBE functional and the basis set 6-31(d,p). The inset shows the model used in the computation.

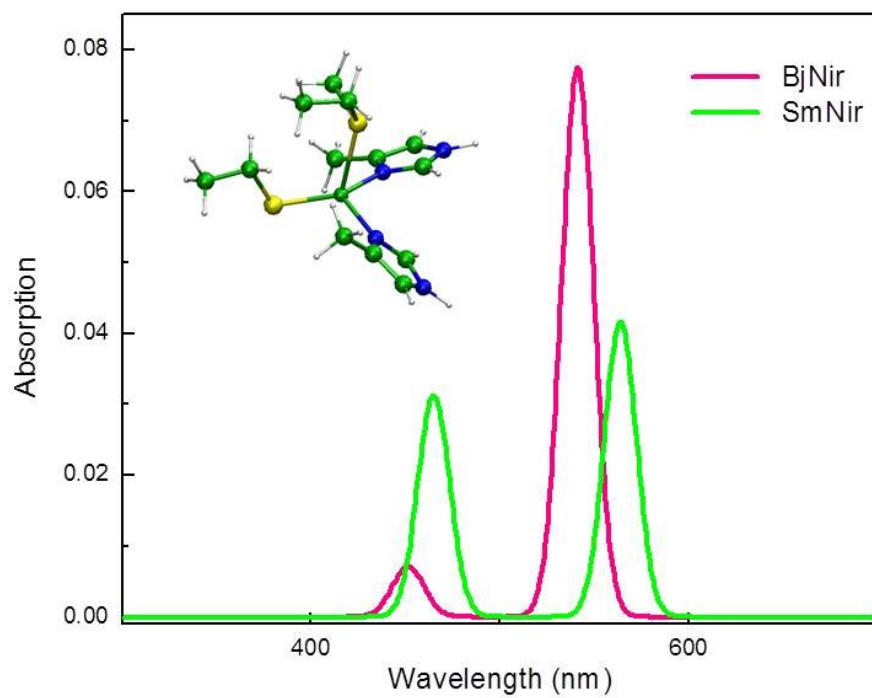

**Fig. S5** EPR spectra of *Bj*NirK at pH 10 showing two type 2 copper (II) overlapping spectral components (red and pink).  $g_{1,2,3} = 2.190, 2.052, 2.023, A_{1,2,3} = 7$  mT for T1 (blue),  $g_{1,2,3} = 2.231, 2.055, 2.040, A_{1,2,3} = 20.6$  mT for the major component (T2<sub>I</sub>; red) and  $g_{1,2,3} = 2.345, 2.055, 2.055, A_{1,2,3} = 16$  mT for the minor component (T2<sub>II</sub>; pink); T1:T2<sub>I</sub>:T2<sub>II</sub> ratio of 1:0.8:0.2

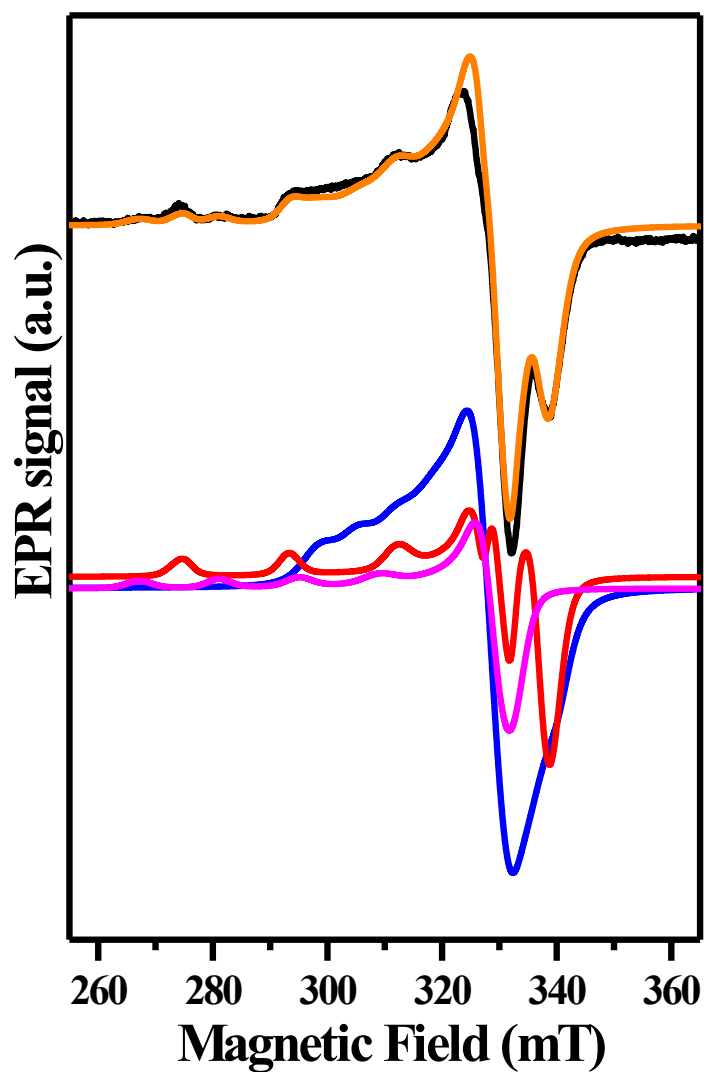



**Fig. S6** EPR spectra of as-purified *Bj*NirK (blue) and *Sm*NirK (green) at pH 10 and upon ascorbate reduction (red) under anaerobic conditions.

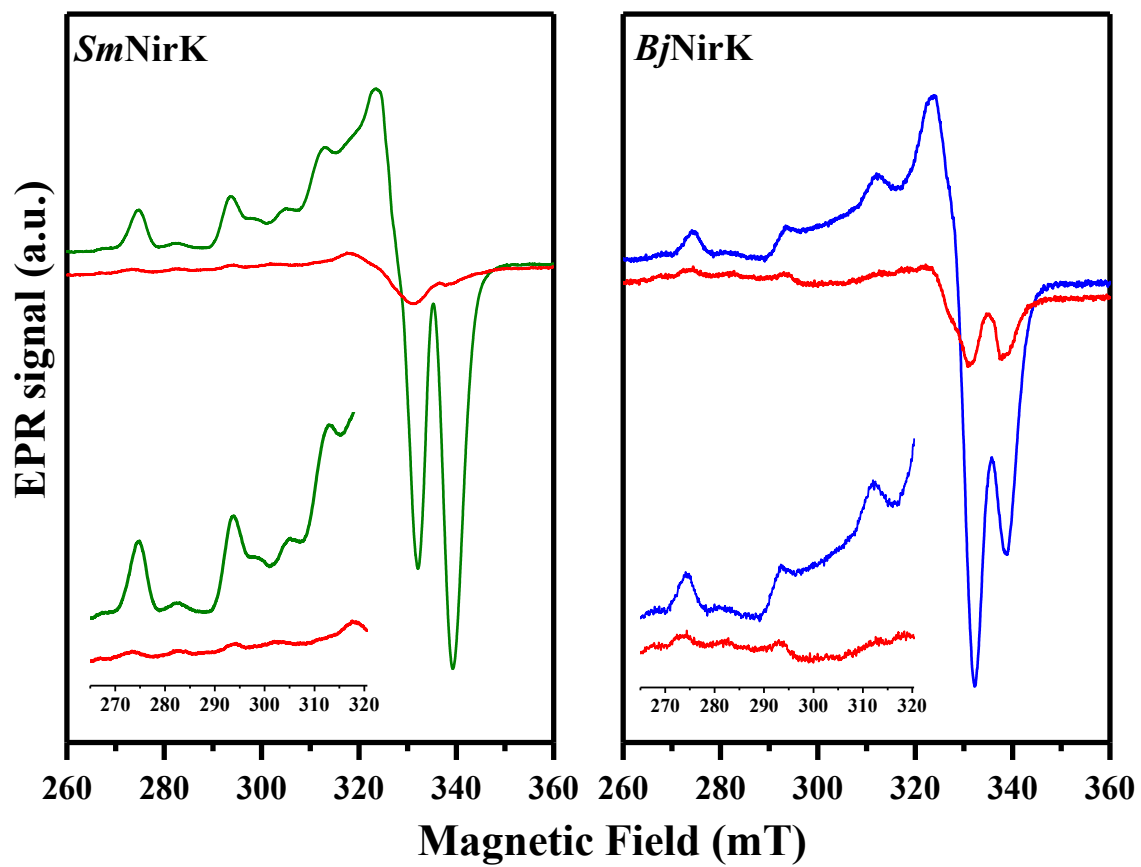

## Cartesian coordinates of the QM part including PDB and residue names and residue numbers.

|                                              |           |           |          |
|----------------------------------------------|-----------|-----------|----------|
| N (PDBName=N, ResName=HSD, ResNum=277_A)     | 21.062037 | 31.953008 | 37.48698 |
| H (PDBName=HN, ResName=HIS, ResNum=277_A)    | 21.976961 | 31.537075 | 37.63645 |
| C (PDBName=CA, ResName=HIS, ResNum=277_A)    | 20.679312 | 32.375623 | 36.18835 |
| H (PDBName=HA, ResName=HIS, ResNum=277_A)    | 19.615387 | 32.642539 | 36.17250 |
| C (PDBName=CB, ResName=HIS, ResNum=277_A)    | 21.491270 | 33.617349 | 35.67343 |
| H (PDBName=HB1, ResName=HIS, ResNum=277_A)   | 21.372926 | 34.413826 | 36.41224 |
| H (PDBName=HB2, ResName=HIS, ResNum=277_A)   | 22.549487 | 33.337129 | 35.68201 |
| N (PDBName=ND1, ResName=HIS, ResNum=277_A)   | 20.230649 | 35.164428 | 34.11443 |
| H (PDBName=HD1, ResName=HIS, ResNum=277_A)   | 19.831119 | 35.721784 | 34.87475 |
| C-CC (PDBName=CG, ResName=HIS, ResNum=277_A) | 21.120034 | 34.128044 | 34.31374 |
| C (PDBName=CE1, ResName=HIS, ResNum=277_A)   | 20.109754 | 35.420939 | 32.81599 |
| H (PDBName=HE1, ResName=HIS, ResNum=277_A)   | 19.513757 | 36.201092 | 32.37257 |
| N (PDBName=NE2, ResName=HIS, ResNum=277_A)   | 20.890310 | 34.577815 | 32.15229 |
| H (PDBName=HE2, ResName=HIS, ResNum=277_A)   | 21.012488 | 34.607102 | 31.11856 |
| C (PDBName=CD2, ResName=HIS, ResNum=277_A)   | 21.523249 | 33.761922 | 33.06261 |
| H (PDBName=HD2, ResName=HIS, ResNum=277_A)   | 22.212897 | 32.995117 | 32.78116 |
| C (PDBName=C, ResName=HIS, ResNum=277_A)     | 20.929979 | 31.227011 | 35.22300 |
| O (PDBName=O, ResName=HIS, ResNum=277_A)     | 21.983000 | 30.586999 | 35.28899 |
| N (PDBName=N, ResName=HIS, ResNum=328_A)     | 25.030101 | 34.558840 | 39.09624 |
| H (PDBName=HN, ResName=HIS, ResNum=328_A)    | 24.169288 | 34.507276 | 39.62284 |
| C (PDBName=CA, ResName=HIS, ResNum=328_A)    | 25.324981 | 35.680342 | 38.28256 |
| H (PDBName=HA, ResName=HIS, ResNum=328_A)    | 26.056464 | 35.395576 | 37.50604 |
| C (PDBName=CB, ResName=HIS, ResNum=328_A)    | 24.057863 | 36.131546 | 37.52594 |
| H (PDBName=HB1, ResName=HIS, ResNum=328_A)   | 23.444440 | 35.235896 | 37.41466 |
| H (PDBName=HB2, ResName=HIS, ResNum=328_A)   | 23.489058 | 36.840457 | 38.12587 |
| N (PDBName=ND1, ResName=HIS, ResNum=328_A)   | 25.130335 | 37.764858 | 35.94238 |
| H (PDBName=HD1, ResName=HIS, ResNum=328_A)   | 25.627436 | 38.250575 | 36.69698 |
| C (PDBName=CG, ResName=HIS, ResNum=328_A)    | 24.316506 | 36.680119 | 36.17036 |
| C (PDBName=CE1, ResName=HIS, ResNum=328_A)   | 25.133982 | 38.037617 | 34.63122 |
| H (PDBName=HE1, ResName=HIS, ResNum=328_A)   | 25.674366 | 38.864341 | 34.19771 |
| N (PDBName=NE2, ResName=HIS, ResNum=328_A)   | 24.368902 | 37.160940 | 33.98058 |
| C (PDBName=CD2, ResName=HIS, ResNum=328_A)   | 23.856297 | 36.308021 | 34.93803 |
| H (PDBName=HD2, ResName=HIS, ResNum=328_A)   | 23.204339 | 35.492732 | 34.67126 |
| C (PDBName=C, ResName=HIS, ResNum=328_A)     | 26.096328 | 36.791902 | 39.01503 |
| O (PDBName=O, ResName=HIS, ResNum=328_A)     | 26.090171 | 37.965751 | 38.70565 |
| N (PDBName=N, ResName=HIS, ResNum=116_C)     | 34.630000 | 39.771006 | 21.07100 |
| H (PDBName=HN, ResName=HIS, ResNum=116_C)    | 34.544088 | 39.875753 | 20.06799 |
| C (PDBName=CA, ResName=HIS, ResNum=116_C)    | 33.526313 | 40.247200 | 21.88115 |
| H (PDBName=HA, ResName=HIS, ResNum=116_C)    | 33.641297 | 39.885150 | 22.91581 |
| C (PDBName=CB, ResName=HIS, ResNum=116_C)    | 33.395410 | 41.752507 | 21.89088 |
| H (PDBName=HB1, ResName=HIS, ResNum=116_C)   | 33.407030 | 41.980759 | 20.82172 |
| H (PDBName=HB2, ResName=HIS, ResNum=116_C)   | 32.446621 | 42.072940 | 22.34504 |
| N (PDBName=ND1, ResName=HIS, ResNum=116_C)   | 34.749468 | 42.436321 | 23.91646 |
| C (PDBName=CG, ResName=HIS, ResNum=116_C)    | 34.541315 | 42.451624 | 22.54645 |
| C (PDBName=CE1, ResName=HIS, ResNum=116_C)   | 35.840242 | 43.170326 | 24.13344 |
| H (PDBName=HE1, ResName=HIS, ResNum=116_C)   | 36.263376 | 43.372051 | 25.10121 |

|                                            |           |           |          |
|--------------------------------------------|-----------|-----------|----------|
| N (PDBName=NE2, ResName=HIS, ResNum=116_C) | 36.343051 | 43.630874 | 22.98246 |
| H (PDBName=HE2, ResName=HIS, ResNum=116_C) | 37.201432 | 44.200827 | 22.85927 |
| C (PDBName=CD2, ResName=HIS, ResNum=116_C) | 35.535968 | 43.187169 | 21.96738 |
| H (PDBName=HD2, ResName=HIS, ResNum=116_C) | 35.730611 | 43.440318 | 20.93928 |
| C (PDBName=C, ResName=HIS, ResNum=116_C)   | 32.279004 | 39.564992 | 21.32800 |
| O (PDBName=O, ResName=HIS, ResNum=116_C)   | 32.272997 | 39.122006 | 20.18399 |
| N (PDBName=N, ResName=ASP, ResNum=119_C)   | 25.181936 | 38.576149 | 24.98501 |
| H (PDBName=HN, ResName=ASP, ResNum=119_C)  | 25.613286 | 39.295907 | 25.54028 |
| C (PDBName=CA, ResName=ASP, ResNum=119_C)  | 24.229044 | 37.752994 | 25.67617 |
| H (PDBName=HA, ResName=ASP, ResNum=119_C)  | 23.882292 | 36.949056 | 25.01888 |
| C (PDBName=CB, ResName=ASP, ResNum=119_C)  | 24.893261 | 37.163485 | 26.94222 |
| H (PDBName=HB1, ResName=ASP, ResNum=119_C) | 25.750440 | 36.562243 | 26.62664 |
| H (PDBName=HB2, ResName=ASP, ResNum=119_C) | 25.306735 | 38.005258 | 27.51179 |
| C (PDBName=CG, ResName=ASP, ResNum=119_C)  | 24.057108 | 36.341730 | 27.92050 |
| O (PDBName=OD1, ResName=ASP, ResNum=119_C) | 22.809186 | 36.346580 |          |
| 27.84913                                   |           |           |          |
| O (PDBName=OD2, ResName=ASP, ResNum=119_C) | 24.718328 | 35.708006 | 28.81101 |
| C (PDBName=C, ResName=ASP, ResNum=119_C)   | 23.067981 | 38.690930 | 26.03507 |
| O (PDBName=O, ResName=ASP, ResNum=119_C)   | 23.269029 | 39.661048 | 26.76392 |
| N (PDBName=N, ResName=HSD, ResNum=121_C)   | 19.656986 | 38.629034 | 28.10801 |
| H (PDBName=HN, ResName=HSD, ResNum=121_C)  | 20.057658 | 39.517469 | 28.37319 |
| C (PDBName=CA, ResName=HSD, ResNum=121_C)  | 18.886192 | 37.905155 | 29.07469 |
| H (PDBName=HA, ResName=HSD, ResNum=121_C)  | 19.224070 | 36.857444 | 29.16899 |
| C (PDBName=CB, ResName=HSD, ResNum=121_C)  | 18.987432 | 38.541173 | 30.45940 |
| H (PDBName=HB1, ResName=HSD, ResNum=121_C) | 18.757439 | 39.603789 | 30.40123 |
| H (PDBName=HB2, ResName=HSD, ResNum=121_C) | 18.203439 | 38.090643 | 31.06915 |
| N (PDBName=ND1, ResName=HSD, ResNum=121_C) | 20.391187 | 38.675428 | 32.50530 |
| H (PDBName=HD1, ResName=HSD, ResNum=121_C) | 19.675951 | 39.168638 | 33.03608 |
| C (PDBName=CG, ResName=HSD, ResNum=121_C)  | 20.294086 | 38.388349 | 31.15677 |
| C (PDBName=CE1, ResName=HSD, ResNum=121_C) | 21.644149 | 38.411524 | 32.91304 |
| H (PDBName=HE1, ResName=HSD, ResNum=121_C) | 21.999320 | 38.540382 | 33.92082 |
| N (PDBName=NE2, ResName=HSD, ResNum=121_C) | 22.361543 | 37.950811 | 31.90051 |
| C (PDBName=CD2, ResName=HSD, ResNum=121_C) | 21.532328 | 37.945959 | 30.78580 |
| H (PDBName=HD2, ResName=HSD, ResNum=121_C) | 21.871945 | 37.642399 | 29.80353 |
| C (PDBName=C, ResName=HSD, ResNum=121_C)   | 17.379093 | 37.845950 | 28.75006 |
| O (PDBName=O, ResName=HSD, ResNum=121_C)   | 16.604966 | 37.075011 | 29.30196 |
| N (PDBName=N, ResName=HSD, ResNum=156_C)   | 24.795021 | 41.653968 | 28.12612 |
| H (PDBName=HN, ResName=HSD, ResNum=156_C)  | 24.480343 | 40.837310 | 27.62437 |
| C (PDBName=CA, ResName=HSD, ResNum=156_C)  | 26.196797 | 41.845758 | 28.38028 |
| H (PDBName=HA, ResName=HSD, ResNum=156_C)  | 26.500636 | 42.886497 | 28.21983 |
| C (PDBName=CB, ResName=HSD, ResNum=156_C)  | 26.558581 | 41.525141 | 29.85438 |
| H (PDBName=HB1, ResName=HSD, ResNum=156_C) | 27.589365 | 41.803676 | 30.04661 |
| H (PDBName=HB2, ResName=HSD, ResNum=156_C) | 25.948513 | 42.167878 | 30.49271 |
| N (PDBName=ND1, ResName=HSD, ResNum=156_C) | 27.233612 | 39.159553 | 30.43483 |
| H (PDBName=HD1, ResName=HSD, ResNum=156_C) | 28.234745 | 39.309263 | 30.35947 |
| C (PDBName=CG, ResName=HSD, ResNum=156_C)  | 26.268214 | 40.116550 | 30.22154 |
| C (PDBName=CE1, ResName=HSD, ResNum=156_C) | 26.637887 | 38.017215 | 30.80795 |
| H (PDBName=HE1, ResName=HSD, ResNum=156_C) | 27.167411 | 37.103441 | 31.03082 |
| N (PDBName=NE2, ResName=HSD, ResNum=156_C) | 25.319055 | 38.180562 | 30.82496 |
| C (PDBName=CD2, ResName=HSD, ResNum=156_C) | 25.081854 | 39.479936 | 30.44428 |
| H (PDBName=HD2, ResName=HSD, ResNum=156_C) | 24.079355 | 39.847274 | 30.32312 |
| C (PDBName=C, ResName=HSD, ResNum=156_C)   | 27.104444 | 40.997978 | 27.48256 |
| O (PDBName=O, ResName=HSD, ResNum=156_C)   | 26.704785 | 39.989999 | 26.90612 |
| N (PDBName=N, ResName=CYS, ResNum=157_C)   | 28.408002 | 41.380450 | 27.40902 |
| H (PDBName=HN, ResName=CYS, ResNum=157_C)  | 28.720145 | 42.187724 | 27.94102 |
| C (PDBName=CA, ResName=CYS, ResNum=157_C)  | 29.355029 | 40.585123 | 26.64258 |
| H (PDBName=HA, ResName=CYS, ResNum=157_C)  | 28.845722 | 40.240309 | 25.73776 |

|                                            |           |           |          |
|--------------------------------------------|-----------|-----------|----------|
| C (PDBName=CB, ResName=CYS, ResNum=157_C)  | 30.573178 | 41.428337 | 26.25193 |
| H (PDBName=HB1, ResName=CYS, ResNum=157_C) | 30.259432 | 42.259999 | 25.61636 |
| H (PDBName=HB2, ResName=CYS, ResNum=157_C) | 31.036981 | 41.836501 | 27.15196 |
| S (PDBName=SG, ResName=CYS, ResNum=157_C)  | 31.817790 | 40.419575 | 25.36146 |
| C (PDBName=C, ResName=CYS, ResNum=157_C)   | 29.840985 | 39.371018 | 27.44098 |
| O (PDBName=O, ResName=CYS, ResNum=157_C)   | 30.105992 | 39.477990 | 28.63400 |
| N (PDBName=N, ResName=HIS, ResNum=167_C)   | 35.067000 | 41.022003 | 30.85400 |
| H (PDBName=HN, ResName=HIS, ResNum=167_C)  | 34.875841 | 40.033482 | 30.77571 |
| C (PDBName=CA, ResName=HIS, ResNum=167_C)  | 34.402774 | 41.911944 | 29.93455 |
| H (PDBName=HA, ResName=HIS, ResNum=167_C)  | 35.090646 | 42.707505 | 29.61490 |
| C (PDBName=CB, ResName=HIS, ResNum=167_C)  | 33.946047 | 41.160250 | 28.67232 |
| H (PDBName=HB1, ResName=HIS, ResNum=167_C) | 33.369616 | 40.270809 | 28.95290 |
| H (PDBName=HB2, ResName=HIS, ResNum=167_C) | 33.278779 | 41.810050 | 28.09448 |
| N (PDBName=ND1, ResName=HIS, ResNum=167_C) | 35.129627 | 40.961207 | 26.44040 |
| C (PDBName=CG, ResName=HIS, ResNum=167_C)  | 35.117547 | 40.799976 | 27.81539 |
| C (PDBName=CE1, ResName=HIS, ResNum=167_C) | 36.335675 | 40.605747 | 26.01973 |
| H (PDBName=HE1, ResName=HIS, ResNum=167_C) | 36.675955 | 40.628640 | 25.00123 |
| N (PDBName=NE2, ResName=HIS, ResNum=167_C) | 37.092278 | 40.224449 | 27.05568 |
| H (PDBName=HE2, ResName=HIS, ResNum=167_C) | 38.077157 | 40.005571 | 27.01508 |
| C (PDBName=CD2, ResName=HIS, ResNum=167_C) | 36.346409 | 40.348230 | 28.19960 |
| H (PDBName=HD2, ResName=HIS, ResNum=167_C) | 36.718377 | 40.150690 | 29.18794 |
| C (PDBName=C, ResName=HIS, ResNum=167_C)   | 33.216467 | 42.663193 | 30.54832 |
| O (PDBName=O, ResName=HIS, ResNum=167_C)   | 33.066991 | 43.854996 | 30.35698 |
| N (PDBName=N, ResName=SER, ResNum=170_C)   | 34.503005 | 45.246986 | 33.09200 |
| H (PDBName=HN, ResName=SER, ResNum=170_C)  | 34.346440 | 44.337210 | 32.70041 |
| C (PDBName=CA, ResName=SER, ResNum=170_C)  | 35.097767 | 46.262797 | 32.28148 |
| H (PDBName=HA, ResName=SER, ResNum=170_C)  | 35.807342 | 46.857381 | 32.86236 |
| C (PDBName=CB, ResName=SER, ResNum=170_C)  | 35.883715 | 45.679367 | 31.09955 |
| H (PDBName=HB1, ResName=SER, ResNum=170_C) | 35.179544 | 45.109138 | 30.47127 |
| H (PDBName=HB2, ResName=SER, ResNum=170_C) | 36.265103 | 46.517751 | 30.51674 |
| O (PDBName=OG, ResName=SER, ResNum=170_C)  | 36.996143 | 44.896552 | 31.45969 |
| H (PDBName=HG1, ResName=SER, ResNum=170_C) | 36.629382 | 44.123203 | 31.93972 |
| C (PDBName=C, ResName=SER, ResNum=170_C)   | 34.095305 | 47.260140 | 31.67676 |
| O (PDBName=O, ResName=SER, ResNum=170_C)   | 34.481005 | 48.233106 | 31.02451 |
| N (PDBName=N, ResName=GLY, ResNum=171_C)   | 32.790575 | 46.948709 | 31.85384 |
| H (PDBName=HN, ResName=GLY, ResNum=171_C)  | 32.605939 | 46.213558 | 32.53681 |
| C (PDBName=CA, ResName=GLY, ResNum=171_C)  | 31.753428 | 47.846542 | 31.41385 |
| H (PDBName=HA1, ResName=GLY, ResNum=171_C) | 32.245657 | 48.739721 | 31.02407 |
| H (PDBName=HA2, ResName=GLY, ResNum=171_C) | 31.104778 | 48.128540 | 32.24520 |
| C (PDBName=C, ResName=GLY, ResNum=171_C)   | 30.865854 | 47.324163 | 30.30424 |
| O (PDBName=O, ResName=GLY, ResNum=171_C)   | 29.987963 | 48.004660 | 29.78482 |
| N (PDBName=N, ResName=MET, ResNum=172_C)   | 31.035450 | 46.018873 | 29.92594 |
| H (PDBName=HN, ResName=MET, ResNum=172_C)  | 31.791248 | 45.472682 | 30.33283 |
| C (PDBName=CA, ResName=MET, ResNum=172_C)  | 30.345798 | 45.562999 | 28.73737 |
| H (PDBName=HA, ResName=MET, ResNum=172_C)  | 30.192840 | 46.451164 | 28.10517 |
| C (PDBName=CB, ResName=MET, ResNum=172_C)  | 31.097231 | 44.497951 | 27.94659 |
| H (PDBName=HB1, ResName=MET, ResNum=172_C) | 31.229448 | 43.599627 | 28.55499 |
| H (PDBName=HB2, ResName=MET, ResNum=172_C) | 30.462135 | 44.222622 | 27.09773 |
| C (PDBName=CG, ResName=MET, ResNum=172_C)  | 32.440199 | 45.009101 | 27.45845 |
| H (PDBName=HG1, ResName=MET, ResNum=172_C) | 32.363333 | 46.050531 | 27.14346 |
| H (PDBName=HG2, ResName=MET, ResNum=172_C) | 33.185642 | 44.959089 | 28.25437 |
| S (PDBName=SD, ResName=MET, ResNum=172_C)  | 33.155825 | 44.119445 | 26.04375 |
| C (PDBName=CE, ResName=MET, ResNum=172_C)  | 32.079558 | 44.659287 | 24.69130 |
| H (PDBName=HE1, ResName=MET, ResNum=172_C) | 32.509564 | 44.263267 | 23.76831 |
| H (PDBName=HE2, ResName=MET, ResNum=172_C) | 31.059119 | 44.288105 | 24.80346 |
| H (PDBName=HE3, ResName=MET, ResNum=172_C) | 32.069733 | 45.749979 | 24.63458 |
| C (PDBName=C, ResName=MET, ResNum=172_C)   | 28.973037 | 45.047984 | 29.13499 |

|                                             |           |           |          |
|---------------------------------------------|-----------|-----------|----------|
| O (PDBName=O, ResName=MET, ResNum=172_C)    | 28.708939 | 43.848006 | 29.05398 |
| Cu (PDBName=CU, ResName=CU, ResNum=371_C)   | 33.670940 | 41.571406 | 25.32516 |
| Cu (PDBName=CU, ResName=CU, ResNum=372_C)   | 24.143311 | 37.176540 | 32.03380 |
| O (PDBName=OH2, ResName=TIP, ResNum=H2OA1)  | 24.616881 | 35.363636 | 31.36837 |
| H (PDBName=H1, ResName=TIP, ResNum= H2OA1)  | 25.570500 | 35.151785 | 31.32262 |
| H (PDBName=H1, ResName=TIP, ResNum= H2OA1)  | 24.424233 | 35.445356 | 30.38111 |
| O (PDBName=OH2, ResName=TIP, ResNum= H2OA2) | 21.163819 | 34.710027 |          |
| 29.33100                                    |           |           |          |
| H (PDBName=H2, ResName=TIP, ResNum= H2OA2)  | 21.870471 | 35.256894 | 28.89342 |
| H (PDBName=H1, ResName=TIP, ResNum= H2OA2)  | 20.366372 | 35.120051 | 28.96894 |
| O (PDBName=OH2, ResName=TIP, ResNum= H2OA3) | 26.991407 | 35.186405 |          |
| 30.07555                                    |           |           |          |
| H (PDBName=H2, ResName=TIP, ResNum= H2OA3)  | 26.331322 | 35.459955 | 29.39188 |
| H (PDBName=H1, ResName=TIP, ResNum= H2OA3)  | 27.297514 | 34.319042 | 29.80244 |
